# Supplementary material for: Excited-state relaxation mechanisms of 2,2′-(1-phenyl-1H-1,2,4-triazole-3,5-diyl)diphenol: single- or double-proton transfer?
Source: Royal Society of Chemistry journal article supplement (doi:10.1039/d3cp02680a), 2023-01-01
Supplement: d3cp02680a1.pdf [file d3cp02680a1.pdf]

# **Supporting Information: Excited-State Relaxation Mechanisms of 2,2'-(1-Phenyl-1H-1,2,4-triazole-3,5-diyl) diphenol: Single or Double Proton Transfer?**

Jiahui Wu, Jihuan He, Xiaohang Chen, Wei Wang and Shu-Hua Xia\*

*College of Life and Environmental Sciences, Minzu University of China, Beijing 100081, China*

## **Table of Contents**

1. CASSCF Active Space
2. OM2/MRCI Active Space
3. Molecular orbitals involved in the electronic transitions to the first singlet state
4. Structures of Three  $S_1/S_0$  Conical Intersections and  $S_0$ -ENOL
5. Key Dihedral Angles and Energies (in kcal/mol) of All Optimized Structures in the  $S_0$  and  $S_1$  state
6. The  $S_1$  Minimum-energy Potential Energy Surface with Respect to the N6-H1 and N8-H13 Reaction Coordinates
7. Cartesian Coordinates of All Optimized CASSCF Structures
8. Cartesian Coordinates of All Optimized OM2/MRCI Structures

### 1. CASSCF Active Space

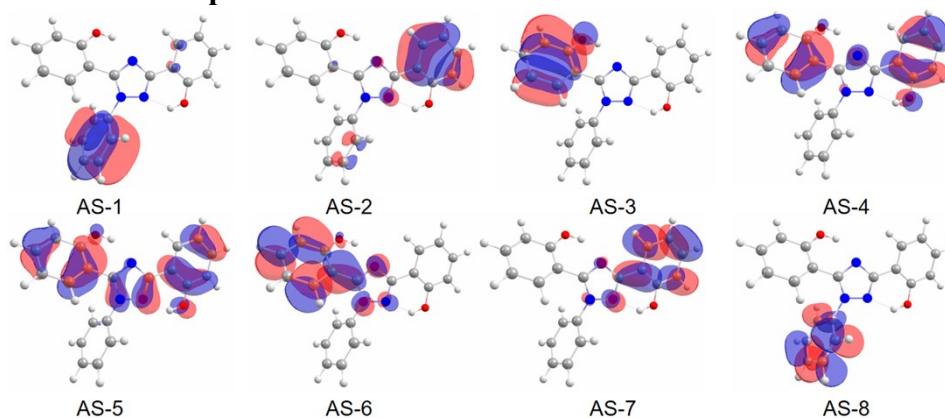

Figure S1. The active space (10e,8o) of ExPh used in the CAS(10,8)/6-31G\* calculations. See text for simulation details.

### 2. OM2/MRCI Active Space

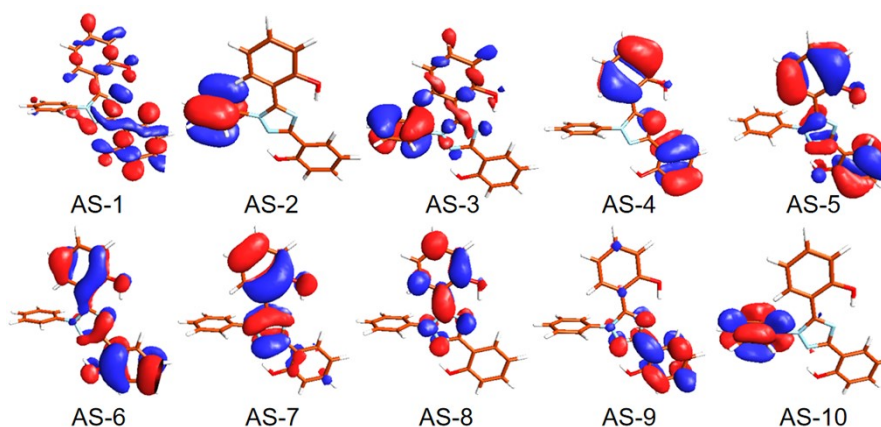

Figure S2. The active space (12e,10o) of ExPh used in the OM2/MRCI calculations. See text for simulation details.

### 3. Molecular orbitals involved in the electronic transitions to the first singlet state

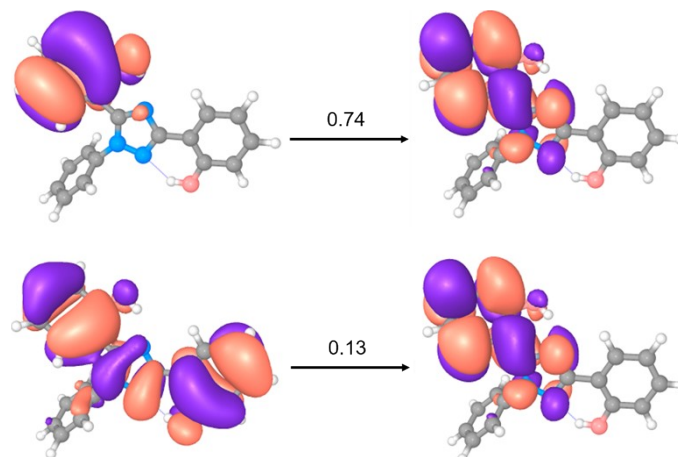

Figure S3. Molecular orbitals involved in the electronic transitions to the first singlet state calculated at the MS-CASPT2//CAS(10,8)/def-TZVP level.

### 4. Structures of Three $S_1/S_0$ Conical Intersections and $S_0$ -ENOL

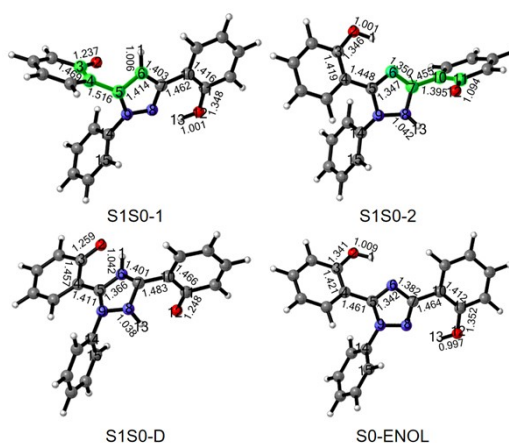

Figure S4. Structures of three  $S_1/S_0$  conical intersections and  $S_0$ -ENOL with selected bond lengths (Å) obtained at the OM2/MRCI level.

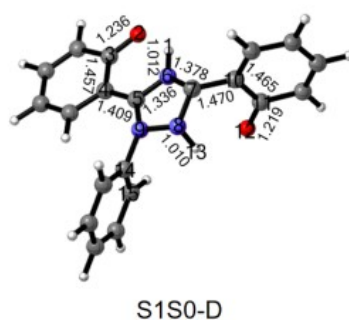

Figure S5. Structure of  $S_1S_0$ -D conical intersection with selected bond lengths (Å) obtained at the CAS(10,8)/6-31G\* level.

## 5. Key Dihedral Angles and Energies (kcal/mol) of All Optimized Structures in the $S_0$ and $S_1$ state

Table S1. Key Dihedral Angles (Degree) of ExPh in Different Structures from OM2/MRCI and CASSCF Optimizations and Relative Energies  $\Delta E$  (kcal/mol) from OM2/MRCI and MS-CASPT2 Single-point Calculations.

| structure       | N6C5C4C3 | N6C7C10C11 | C5N9C14C15 | $\Delta E$ |
|-----------------|----------|------------|------------|------------|
| <b>OM2/MRCI</b> |          |            |            |            |
| S0-ENOL         | 0        | -180.0     | -91.1      | 0          |
| S1S0-1          | 60.0     | -178.6     | -95.9      | 66.0       |
| S1S0-2          | 1.1      | -90.6      | -123.1     | 74.8       |
| S1S0-D          | 2.9      | -66.6      | -118.7     | 81.5       |
| <b>CASSCF</b>   |          |            |            |            |
| S0-ENOL         | 36.1     | -175.3     | -111.9     | 0          |
| S0-KETO-1       | 0.9      | 177.0      | -95.8      | 16.9       |

|           |      |        |        |      |
|-----------|------|--------|--------|------|
| S0-KETO-2 | 34.1 | -178.1 | -131.0 | 27.6 |
| S1-ENOL   | 21.5 | 169.7  | 165.2  | 77.6 |
| S1S0-1    | 59.3 | 178.9  | -96.7  | 66.6 |
| S1S0-2    | 15.2 | 91.9   | -140.6 | 69.8 |
| S1S0-D    | 3.8  | 66.2   | -130.5 | 92.2 |

## 6. The $S_1$ Minimum-energy Potential Energy Surface with Respect to the N6-H1 and N8-H13 Reaction Coordinates

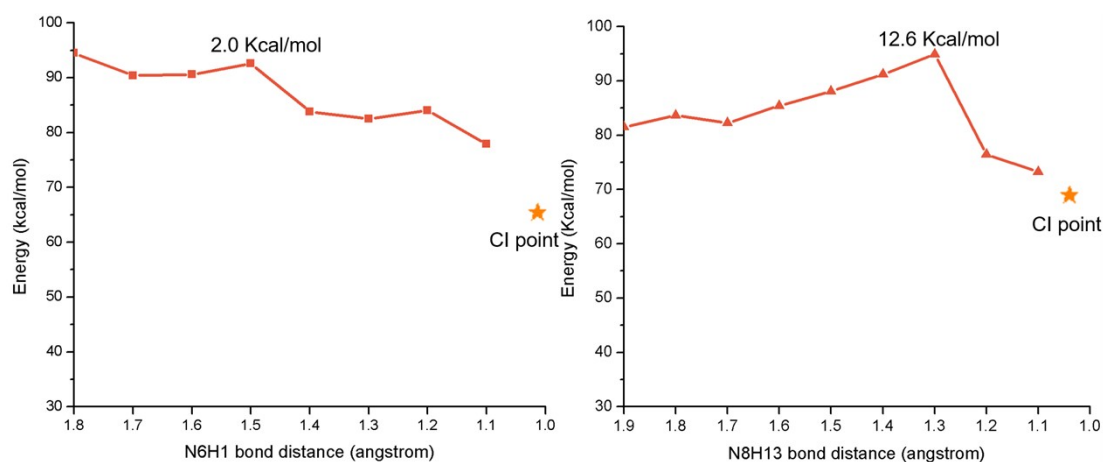

Figure S6. The  $S_1$  minimum-energy potential energy surfaces with respect to the N6-H1 and N8-H13 reaction coordinates computed at the MS-CASPT2//CAS(10,8)/6-31G\* level.

In order to ensure the accuracy of the computational method used for the system, we have performed the calculations of minimum energy paths in the  $S_1$  excited state at MS-CASPT2//CAS(10,8)/6-31G\* level. The calculations show that the energy barrier of proton-transfer process along N6-H1 reaction coordinate is very small (2.0 Kcal/mol), while there is a larger energy barrier (ca. 12.6 Kcal/mol) in the  $S_1$  state along the N8-H13 bond length. Therefore, the MS-CASPT2//CASSCF calculations indicate that the ESIPT-I reaction is more favorable to take place than the ESIPT-II process, which is in good accordance with the results from OM2/MRCI method. Energetically, the two conical intersections involving the proton transfer reaction coordinates are all accessible.

## 7. Cartesian Coordinates of All Optimized CASSCF Structures

### S0-ENOL

|   |             |            |             |
|---|-------------|------------|-------------|
| C | -3.10645859 | 2.81451305 | 1.38024030  |
| C | -2.13576491 | 1.80630765 | 1.25255178  |
| C | -1.40900834 | 1.71748961 | 0.10264867  |
| C | -1.59687227 | 2.63205650 | -0.94758112 |

|         |             |             |             |
|---------|-------------|-------------|-------------|
| C       | -2.54218548 | 3.62475430  | -0.81165641 |
| C       | -3.30700353 | 3.70965724  | 0.36669174  |
| H       | -3.68342600 | 2.87713153  | 2.28462026  |
| H       | -1.97003939 | 1.10718948  | 2.05101456  |
| H       | -0.99755183 | 2.54951185  | -1.83514690 |
| H       | -2.69601670 | 4.33302978  | -1.60497195 |
| H       | -4.04632082 | 4.48357519  | 0.46683378  |
| C       | -4.05704273 | -2.93910876 | -0.31074532 |
| C       | -2.94026530 | -3.41543261 | 0.39218929  |
| C       | -1.76877078 | -2.66878988 | 0.40761935  |
| C       | -1.73633120 | -1.42405161 | -0.23232107 |
| C       | -2.86283001 | -0.98142096 | -0.95411435 |
| C       | -4.00732114 | -1.73144778 | -0.99642174 |
| H       | -4.95344202 | -3.53207790 | -0.32810910 |
| H       | -2.95123347 | -4.36475513 | 0.89150833  |
| H       | -2.81939075 | -0.04254637 | -1.47172984 |
| H       | -4.86207340 | -1.38704824 | -1.54892235 |
| C       | 3.59387927  | -1.42842539 | -0.26982360 |
| C       | 4.97636771  | -1.57939360 | -0.25371330 |
| C       | 5.77099399  | -0.46759594 | -0.03959799 |
| C       | 5.21261255  | 0.78155799  | 0.15383553  |
| C       | 3.83128089  | 0.94130454  | 0.13637622  |
| C       | 3.00853345  | -0.16855988 | -0.07298780 |
| H       | 2.95607618  | -2.27440359 | -0.43741282 |
| H       | 5.41720727  | -2.54722383 | -0.40606025 |
| H       | 6.84193263  | -0.57028440 | -0.02375558 |
| H       | 5.82198517  | 1.64989362  | 0.31919620  |
| C       | -0.48874486 | -0.61144811 | -0.16956542 |
| C       | 1.53662505  | -0.05484513 | -0.08816734 |
| N       | -0.40778398 | 0.70526287  | -0.03897430 |
| N       | 0.89788908  | 1.06231591  | -0.00060328 |
| N       | 0.70425909  | -1.12644825 | -0.19572132 |
| O       | 3.37089558  | 2.18522854  | 0.32882119  |
| O       | -0.72565029 | -3.19468461 | 1.05213279  |
| H       | 2.42018831  | 2.21744509  | 0.28689480  |
| H       | 0.08052353  | -2.74636373 | 0.81072136  |
| S1-ENOL |             |             |             |
| C       | -3.23464217 | 2.15783479  | 2.33596337  |

|           |             |             |             |
|-----------|-------------|-------------|-------------|
| C         | -2.50290040 | 1.25296970  | 1.59160627  |
| C         | -1.50719112 | 1.71775889  | 0.69804428  |
| C         | -1.28535941 | 3.11721106  | 0.58813310  |
| C         | -2.03583334 | 3.98543402  | 1.32709375  |
| C         | -3.02032146 | 3.51790933  | 2.20995519  |
| H         | -3.97767321 | 1.79091860  | 3.02022110  |
| H         | -2.67095938 | 0.20400765  | 1.71014194  |
| H         | -0.52283156 | 3.46900863  | -0.07522797 |
| H         | -1.86337980 | 5.04232576  | 1.23526482  |
| H         | -3.59920413 | 4.21453420  | 2.78746977  |
| C         | -3.81600488 | -3.29710105 | -0.61689172 |
| C         | -2.57404398 | -3.76472944 | -0.18538838 |
| C         | -1.54185741 | -2.89405513 | 0.05347989  |
| C         | -1.73987131 | -1.47589870 | -0.12414564 |
| C         | -3.02382520 | -1.03990346 | -0.58178391 |
| C         | -4.03093540 | -1.93857768 | -0.82544577 |
| H         | -4.60784568 | -4.00066077 | -0.79908778 |
| H         | -2.39628035 | -4.81431391 | -0.04312135 |
| H         | -3.17868130 | 0.00316025  | -0.77306395 |
| H         | -4.98346703 | -1.59166756 | -1.18258702 |
| C         | 3.47490170  | -0.77543767 | -0.12744861 |
| C         | 4.81280799  | -0.76780086 | -0.40019920 |
| C         | 5.34642385  | 0.28086371  | -1.19539724 |
| C         | 4.55069366  | 1.26950356  | -1.67826295 |
| C         | 3.16604921  | 1.27602806  | -1.39312396 |
| C         | 2.61487036  | 0.25174520  | -0.61812934 |
| H         | 3.03659482  | -1.55303522 | 0.46587038  |
| H         | 5.45701669  | -1.54119313 | -0.02612321 |
| H         | 6.39831692  | 0.29236268  | -1.41938921 |
| H         | 4.93946328  | 2.06770338  | -2.28170665 |
| C         | -0.70467536 | -0.58036307 | 0.18087173  |
| C         | 1.20456168  | 0.20321666  | -0.30747979 |
| N         | -0.79218837 | 0.85758620  | -0.05227786 |
| N         | 0.41945954  | 1.23564535  | -0.59007942 |
| N         | 0.62939705  | -0.86266286 | 0.25569271  |
| O         | 2.47653680  | 2.28110928  | -1.90578903 |
| O         | -0.37368513 | -3.38279344 | 0.46221218  |
| H         | 1.55238100  | 2.21993829  | -1.65142637 |
| H         | 0.29956189  | -2.69843112 | 0.46157213  |
| S0-KETO-1 |             |             |             |
| C         | -2.96352607 | 2.84519188  | 1.42922488  |
| C         | -2.05227349 | 1.81014946  | 1.38860563  |
| C         | -1.50013872 | 1.43335397  | 0.16678689  |

|   |             |             |             |
|---|-------------|-------------|-------------|
| C | -1.84987306 | 2.09958841  | -1.00539362 |
| C | -2.76088314 | 3.13392273  | -0.94998165 |
| C | -3.32265457 | 3.50935237  | 0.26366800  |
| H | -3.39489980 | 3.13728532  | 2.36930604  |
| H | -1.76657423 | 1.29000162  | 2.28403921  |
| H | -1.40978696 | 1.79963791  | -1.93830020 |
| H | -3.03627339 | 3.64924518  | -1.85205546 |
| H | -4.03307110 | 4.31478670  | 0.30097386  |
| C | -4.02684673 | -3.52410316 | -0.30390308 |
| C | -2.79653559 | -4.05563096 | -0.24937237 |
| C | -1.60832581 | -3.22672111 | -0.13798452 |
| C | -1.84080285 | -1.78964761 | -0.08013961 |
| C | -3.19285480 | -1.28166724 | -0.14810092 |
| C | -4.24442372 | -2.10182643 | -0.25529137 |
| H | -4.88139820 | -4.17398056 | -0.38817031 |
| H | -2.62989692 | -5.11599556 | -0.28765063 |
| H | -3.35971843 | -0.22465381 | -0.11566467 |
| H | -5.24448474 | -1.71348838 | -0.30722674 |
| C | 3.48260155  | -1.80613680 | 0.25476119  |
| C | 4.84768090  | -1.96531754 | 0.30938430  |
| C | 5.65671983  | -0.83390015 | 0.34646222  |
| C | 5.10356105  | 0.42467542  | 0.33108380  |
| C | 3.72029784  | 0.58812768  | 0.27740238  |
| C | 2.89667230  | -0.53909627 | 0.23614251  |
| H | 2.85859414  | -2.68056798 | 0.22807723  |
| H | 5.27791676  | -2.94905418 | 0.32334351  |
| H | 6.72593284  | -0.93990491 | 0.38885471  |
| H | 5.71349254  | 1.30773024  | 0.36061069  |
| C | -0.70790043 | -0.97004977 | 0.03219606  |
| C | 1.42848895  | -0.41144068 | 0.17158551  |
| N | -0.54314402 | 0.37925837  | 0.11904462  |
| N | 0.77159221  | 0.71179456  | 0.20373381  |
| N | 0.55786030  | -1.44917925 | 0.06944871  |
| O | 3.27213153  | 1.84841079  | 0.26781130  |
| O | -0.48599976 | -3.74525316 | -0.09737187 |
| H | 2.32118330  | 1.89113172  | 0.25146884  |
| H | 0.67933104  | -2.45144181 | 0.01448179  |

S0-KETO-2

|   |             |            |             |
|---|-------------|------------|-------------|
| C | -3.17239265 | 2.70564162 | 1.28076065  |
| C | -2.27100665 | 1.67430506 | 1.12842428  |
| C | -1.35660237 | 1.72215461 | 0.07659588  |
| C | -1.33657448 | 2.80463563 | -0.80136284 |
| C | -2.23490870 | 3.83564992 | -0.62266477 |

|        |              |             |              |
|--------|--------------|-------------|--------------|
| C      | -3.15940555  | 3.79061944  | 0.41313185   |
| H      | -3.88006165  | 2.67263480  | 2.08881136   |
| H      | -2.26559504  | 0.84396089  | 1.80845313   |
| H      | -0.62728660  | 2.82800362  | -1.60817591  |
| H      | -2.21930042  | 4.67341973  | -1.29529021  |
| H      | -3.85973546  | 4.59440758  | 0.54563135   |
| C      | -4.08121292  | -2.93826596 | -0.26002888  |
| C      | -2.98166248  | -3.42713498 | 0.40647867   |
| C      | -1.79243691  | -2.70103280 | 0.42947560   |
| C      | -1.73825286  | -1.45124877 | -0.19285690  |
| C      | -2.85853498  | -0.98888966 | -0.88611518  |
| C      | -4.02498082  | -1.71743762 | -0.92581077  |
| H      | -4.98761829  | -3.51656543 | -0.27693481  |
| H      | -3.00257686  | -4.37748570 | 0.90536097   |
| H      | -2.80723508  | -0.04934556 | -1.40324840  |
| H      | -4.87627542  | -1.34817119 | -1.46644273  |
| C      | 3.70310723   | -1.50149568 | -0.16224890  |
| C      | 5.04231627   | -1.54807034 | -0.13566033  |
| C      | 5.77997571   | -0.31404649 | -0.06155090  |
| C      | 5.17714244   | 0.88753167  | -0.01828263  |
| C      | 3.73142919   | 1.00658449  | -0.04590640  |
| C      | 3.00797050   | -0.24342531 | -0.11936103  |
| H      | 3.12145565   | -2.40361063 | -0.22139809  |
| H      | 5.57022735   | -2.48288843 | -0.17043817  |
| H      | 6.85585935   | -0.36242758 | -0.04061931  |
| H      | 5.73711282   | 1.80280234  | 0.03635798   |
| C      | -0.48378347  | -0.66823267 | -0.14541304  |
| C      | 1.61440447   | -0.18215515 | -0.13380686  |
| N      | -0.40172707  | 0.68204852  | -0.08997707  |
| N      | 0.91798479   | 0.96822617  | -0.12005807  |
| N      | 0.71114257   | -1.21153777 | -0.16247184  |
| O      | 3.16403241   | 2.10862409  | -0.00639676  |
| O      | -0.75966934  | -3.25424480 | 1.07405656   |
| H      | 1.35287987   | 1.87030825  | 0.00426721   |
| H      | 0.06151945   | -2.84197792 | 0.82050732   |
| S1S0-1 |              |             |              |
| C      | -2.720615407 | 2.526458010 | 1.811142610  |
| C      | -1.721768452 | 1.674982531 | 1.362238200  |
| C      | -1.361006387 | 1.720154133 | 0.002974601  |
| C      | -1.973089740 | 2.619176558 | -0.881990495 |
| C      | -2.982672284 | 3.448745246 | -0.410028700 |
| C      | -3.362567472 | 3.403399217 | 0.932470168  |
| H      | -3.002127596 | 2.521548531 | 2.872575004  |



|        |              |              |              |
|--------|--------------|--------------|--------------|
| H      | -1.194510407 | 1.013492555  | 2.052455940  |
| H      | -1.650799639 | 2.646734723  | -1.926227200 |
| H      | -3.474485248 | 4.151870619  | -1.093174827 |
| H      | -4.151024311 | 4.066363762  | 1.297880224  |
| C      | -3.888675678 | -2.681292780 | 0.894950697  |
| C      | -2.851277753 | -2.320314266 | 1.718056364  |
| C      | -1.678708580 | -1.610309277 | 1.170668226  |
| C      | -1.671875160 | -1.268472929 | -0.269230557 |
| C      | -2.717271944 | -1.658537660 | -1.024968203 |
| C      | -3.833346916 | -2.372734458 | -0.461235621 |
| H      | -4.766113534 | -3.206977650 | 1.287874604  |
| H      | -2.855023994 | -2.535787045 | 2.787946322  |
| H      | -2.733108515 | -1.419904984 | -2.091494298 |
| H      | -4.661082217 | -2.663283550 | -1.116778968 |
| C      | 3.718810358  | -1.400272662 | -0.622151734 |
| C      | 5.102669016  | -1.512405527 | -0.493890207 |
| C      | 5.860366131  | -0.426383092 | -0.048117034 |
| C      | 5.251158057  | 0.783059925  | 0.266601387  |
| C      | 3.854486727  | 0.900743505  | 0.139198498  |
| C      | 3.078984803  | -0.197037752 | -0.304890864 |
| H      | 3.134256223  | -2.256534892 | -0.981514532 |
| H      | 5.596202203  | -2.455511025 | -0.743215582 |
| H      | 6.947235393  | -0.527236449 | 0.052643913  |
| H      | 5.824744099  | 1.643815029  | 0.604435414  |
| C      | -0.546591091 | -0.494584668 | -0.941519147 |
| C      | 1.627329845  | -0.054165636 | -0.432612043 |
| N      | -0.330749756 | 0.865916514  | -0.508995069 |
| N      | 0.961497577  | 1.072936035  | -0.210515018 |
| N      | 0.751747163  | -1.060748189 | -0.883180593 |
| O      | 3.355442603  | 2.110517670  | 0.459771134  |
| O      | -0.735067363 | -1.374346130 | 1.921743709  |
| H      | 2.362801643  | 2.130882453  | 0.348183834  |
| H      | 0.965349882  | -2.040532486 | -0.816663251 |
| S1S0-2 |              |              |              |
| C      | -3.53169634  | -0.20424871  | 0.48429185   |
| C      | -2.60038510  | 0.80928716   | 0.47235525   |
| C      | -1.25165460  | 0.52975575   | 0.27229091   |
| C      | -0.84135596  | -0.79741567  | 0.05359459   |
| C      | -1.81106082  | -1.80911788  | 0.09104514   |
| C      | -3.13952493  | -1.52725697  | 0.30242672   |
| H      | -4.56804700  | 0.03219126   | 0.64712644   |
| H      | -2.88304201  | 1.83369897   | 0.62617438   |
| H      | -1.50443791  | -2.82833879  | -0.03892078  |

|   |             |             |             |
|---|-------------|-------------|-------------|
| H | -3.86270140 | -2.32106954 | 0.32987587  |
| C | 4.73618875  | 0.33899877  | -0.91023933 |
| C | 6.01310281  | 0.79054170  | -0.62233327 |
| C | 6.63017110  | 0.46342978  | 0.60116351  |
| C | 5.99312560  | -0.31499519 | 1.51186248  |
| C | 4.66609830  | -0.83724089 | 1.25012073  |
| C | 4.04006762  | -0.42854067 | 0.00205194  |
| H | 4.27245688  | 0.60505715  | -1.84266042 |
| H | 6.53363345  | 1.40653975  | -1.33223530 |
| H | 7.61772029  | 0.83615546  | 0.80645602  |
| H | 6.44300051  | -0.58269654 | 2.44963071  |
| C | 0.56290831  | -1.11264870 | -0.17832481 |
| C | 2.67728640  | -0.91270410 | -0.24174970 |
| N | 1.02343592  | -2.34059660 | -0.65942802 |
| N | 2.43266591  | -2.19669418 | -0.72846743 |
| N | 1.54498548  | -0.29632202 | 0.07452570  |
| O | 4.10373981  | -1.61633116 | 2.00862889  |
| O | -0.41667342 | 1.57156287  | 0.29156985  |
| H | 2.88466342  | -2.90585088 | -0.17560854 |
| H | 0.49195450  | 1.27805263  | 0.29795758  |
| C | 0.46237677  | -2.94730618 | -1.83705602 |
| C | 0.27618748  | -4.32438945 | -1.84083394 |
| C | 0.14784850  | -2.19478193 | -2.96979854 |
| C | -0.22779061 | -4.95189051 | -2.97713522 |
| H | 0.52147603  | -4.89154630 | -0.96149959 |
| C | -0.36532188 | -2.82995472 | -4.09443046 |
| H | 0.29737385  | -1.13047861 | -2.96759631 |
| C | -0.54977082 | -4.21145659 | -4.09453087 |
| H | -0.37019361 | -6.01752902 | -2.97588629 |
| H | -0.61528283 | -2.25245738 | -4.96578176 |
| H | -0.94534636 | -4.69830447 | -4.96775558 |

S1S0-D

|   |             |             |             |
|---|-------------|-------------|-------------|
| C | -1.68424937 | 1.63023097  | 3.34870416  |
| C | -1.07698772 | 0.74525872  | 2.43983951  |
| C | -1.15323397 | 1.00193514  | 1.09836029  |
| C | -1.80244575 | 2.15328596  | 0.62032483  |
| C | -2.38065786 | 3.02023548  | 1.50387995  |
| C | -2.32816182 | 2.75791045  | 2.88618385  |
| H | -1.63585451 | 1.42259544  | 4.40191746  |
| H | -0.56854165 | -0.13313708 | 2.79402931  |
| H | -1.83362646 | 2.32914679  | -0.43880073 |
| H | -2.88089498 | 3.90124315  | 1.14468097  |
| H | -2.78983977 | 3.43924937  | 3.57770493  |

|   |             |             |             |
|---|-------------|-------------|-------------|
| C | -3.84325696 | -3.82903065 | 0.73875855  |
| C | -2.68272514 | -4.33270394 | 0.28033945  |
| C | -1.54128842 | -3.48442284 | -0.01118881 |
| C | -1.71829333 | -2.06708829 | 0.27515446  |
| C | -2.98551845 | -1.58975447 | 0.74155635  |
| C | -4.01796132 | -2.42642566 | 0.96819424  |
| H | -4.66896132 | -4.49256490 | 0.93266241  |
| H | -2.55036602 | -5.38250263 | 0.09529149  |
| H | -3.12631319 | -0.53915453 | 0.89909410  |
| H | -4.96533844 | -2.05186414 | 1.30881378  |
| C | 3.43606199  | -0.72346028 | -2.19977527 |
| C | 4.80991188  | -0.89456354 | -2.27802265 |
| C | 5.58101720  | -1.07082062 | -1.10252227 |
| C | 5.00079074  | -1.06169040 | 0.11812021  |
| C | 3.56362822  | -0.86392974 | 0.26093505  |
| C | 2.79816886  | -0.73052100 | -0.98066456 |
| H | 2.86057309  | -0.59547433 | -3.09842271 |
| H | 5.29447670  | -0.90120769 | -3.23630066 |
| H | 6.64316971  | -1.21091514 | -1.19416991 |
| H | 5.56450319  | -1.19341390 | 1.02258186  |
| C | -0.63066022 | -1.21003349 | 0.01613179  |
| C | 1.34153555  | -0.57748178 | -0.85001104 |
| N | -0.52249462 | 0.14373291  | 0.15277897  |
| N | 0.77593472  | 0.56618163  | -0.25905567 |
| N | 0.50776214  | -1.63020219 | -0.54188938 |
| O | 3.01636268  | -0.77715380 | 1.34619324  |
| O | -0.50265410 | -3.96872818 | -0.47426678 |
| H | 1.30348797  | 0.81395509  | 0.56539311  |
| H | 0.57518889  | -2.60712312 | -0.79845460 |

## 8. Cartesian Coordinates of All Optimized OM2/MRCI Structures

S0-ENOL

|   |               |              |               |
|---|---------------|--------------|---------------|
| C | -2.9008600921 | 3.1522809236 | 1.3595839215  |
| C | -1.9264268138 | 2.1585919319 | 1.3241034815  |
| C | -1.4187804943 | 1.7840787225 | 0.0744951539  |
| C | -1.8335215301 | 2.3792544673 | -1.1226845906 |
| C | -2.8092434323 | 3.3698828975 | -1.0532559290 |
| C | -3.3384363117 | 3.7497161973 | 0.1788770459  |
| H | -3.3162704141 | 3.4669955382 | 2.3212653672  |
| H | -1.5616712598 | 1.6860108251 | 2.2365782446  |
| H | -1.3979624605 | 2.0748382951 | -2.0748447542 |
| H | -3.1532610876 | 3.8541633999 | -1.9717159753 |

|        |               |               |               |
|--------|---------------|---------------|---------------|
| H      | -4.1030892460 | 4.5328433190  | 0.2204685642  |
| C      | -4.0526491620 | -2.9915815786 | -0.4562458562 |
| C      | -2.8109143381 | -3.6038085082 | -0.4643236685 |
| C      | -1.6518928615 | -2.8068287593 | -0.3484076771 |
| C      | -1.7654704610 | -1.3955527328 | -0.2254183105 |
| C      | -3.0335142211 | -0.8022232663 | -0.2200542718 |
| C      | -4.1668365571 | -1.5998786854 | -0.3350329693 |
| H      | -4.9595275473 | -3.6006198828 | -0.5456191656 |
| H      | -2.6972302220 | -4.6821687243 | -0.5572913663 |
| H      | -3.1348609459 | 0.2815170908  | -0.1261406969 |
| H      | -5.1572775154 | -1.1360166280 | -0.3307916749 |
| C      | 3.6139705842  | -1.4842395217 | -0.0290308927 |
| C      | 5.0009105203  | -1.6047113813 | 0.0127407923  |
| C      | 5.8067773243  | -0.4709890505 | 0.1454986166  |
| C      | 5.2447378784  | 0.7956424855  | 0.2383367362  |
| C      | 3.8431956272  | 0.9256120912  | 0.1968803873  |
| C      | 3.0254123511  | -0.2175381503 | 0.0628078994  |
| H      | 2.9809569384  | -2.3694646641 | -0.1328411011 |
| H      | 5.4611841793  | -2.5943699591 | -0.0589892320 |
| H      | 6.8972281070  | -0.5818646195 | 0.1768782513  |
| H      | 5.8545796822  | 1.6914098828  | 0.3422099235  |
| C      | -0.5327114601 | -0.6198829699 | -0.1086270440 |
| C      | 1.5667277597  | -0.0965358138 | 0.0183351477  |
| N      | -0.3916259257 | 0.7742597600  | 0.0224343949  |
| N      | 0.8918206085  | 1.0785840038  | 0.0986412172  |
| N      | 0.6951890558  | -1.1607983409 | -0.1107379124 |
| O      | 3.3899574701  | 2.1951827901  | 0.2941225221  |
| O      | -0.4913372465 | -3.4789008579 | -0.3649467364 |
| H      | 2.3942365173  | 2.2221856617  | 0.2587834063  |
| H      | 0.2946140462  | -2.8527871641 | -0.2785982730 |
| S1S0-1 |               |               |               |
| C      | -2.7427744336 | 2.5215342209  | 1.8099927690  |
| C      | -1.7450977594 | 1.6589173212  | 1.3779138848  |
| C      | -1.3650210082 | 1.7047087567  | 0.0256350211  |
| C      | -1.9454299395 | 2.6117179629  | -0.8737971966 |
| C      | -2.9524344105 | 3.4504870417  | -0.4165047495 |
| C      | -3.3575026471 | 3.4050711191  | 0.9200300604  |
| H      | -3.0431973110 | 2.5183533566  | 2.8658213751  |
| H      | -1.2343622134 | 0.9873812289  | 2.0698725561  |
| H      | -1.6066362652 | 2.6401334461  | -1.9130760719 |
| H      | -3.4282868636 | 4.1593021490  | -1.1050229747 |
| H      | -4.1476445954 | 4.0747036688  | 1.2733703995  |
| C      | -3.8971525368 | -2.6717575788 | 0.8904537368  |

|   |               |               |               |
|---|---------------|---------------|---------------|
| C | -2.8683392487 | -2.3301034476 | 1.7235038299  |
| C | -1.6923123667 | -1.6293930848 | 1.1868962801  |
| C | -1.6774612385 | -1.2842073203 | -0.2408215143 |
| C | -2.7366147280 | -1.6564868436 | -1.0209472848 |
| C | -3.8395798883 | -2.3502776496 | -0.4768895569 |
| H | -4.7799891904 | -3.1938486511 | 1.2753509270  |
| H | -2.8843268311 | -2.5528511060 | 2.7927089187  |
| H | -2.7375025795 | -1.4039654536 | -2.0850819874 |
| H | -4.6744073152 | -2.6320943207 | -1.1290366532 |
| C | 3.7312406195  | -1.3940801845 | -0.6405553936 |
| C | 5.1136187069  | -1.5003237069 | -0.5077920163 |
| C | 5.8673801541  | -0.4118471812 | -0.0587188682 |
| C | 5.2546091788  | 0.7954400987  | 0.2545193735  |
| C | 3.8571562617  | 0.9097857010  | 0.1197834627  |
| C | 3.0869953361  | -0.1904167386 | -0.3277173547 |
| H | 3.1506932551  | -2.2544112906 | -0.9975222557 |
| H | 5.6120265986  | -2.4427511892 | -0.7546491322 |
| H | 6.9537532510  | -0.5120902482 | 0.0471020085  |
| H | 5.8241627624  | 1.6572761263  | 0.5978045314  |
| C | -0.5429397418 | -0.5157330239 | -0.8900623209 |
| C | 1.6364449445  | -0.0563229595 | -0.4464101934 |
| N | -0.3307071670 | 0.8295839515  | -0.4470744782 |
| N | 0.9605684425  | 1.0732017070  | -0.2284150775 |
| N | 0.7567538014  | -1.0723338098 | -0.8491048087 |
| O | 3.3551048032  | 2.1194491564  | 0.4368984148  |
| O | -0.7416259826 | -1.3862849106 | 1.9395503425  |
| H | 2.3606986089  | 2.1397886508  | 0.3247338833  |
| H | 0.9796620348  | -2.0518312945 | -0.8013253375 |

S1S0-2

|   |              |              |              |
|---|--------------|--------------|--------------|
| C | -3.539254779 | -0.227618697 | 0.454594623  |
| C | -2.575798414 | 0.733448715  | 0.722992754  |
| C | -1.221422039 | 0.428615039  | 0.499667184  |
| C | -0.840525795 | -0.846016512 | 0.006192590  |
| C | -1.840420780 | -1.802390539 | -0.245885304 |
| C | -3.170581885 | -1.492002272 | -0.019192587 |
| H | -4.598937409 | 0.005890495  | 0.610549621  |
| H | -2.838373456 | 1.718689103  | 1.103266209  |
| H | -1.560698940 | -2.792980608 | -0.616241794 |
| H | -3.944859044 | -2.240122425 | -0.213877100 |
| C | 4.742328600  | 0.362742960  | -0.969318700 |
| C | 6.007812071  | 0.866333771  | -0.675402471 |
| C | 6.629583643  | 0.601953202  | 0.558578174  |
| C | 6.013236445  | -0.183533135 | 1.511243267  |

|   |              |              |              |
|---|--------------|--------------|--------------|
| C | 4.703454571  | -0.750392552 | 1.263116698  |
| C | 4.074414971  | -0.400034650 | -0.011815053 |
| H | 4.267099502  | 0.585905066  | -1.928580111 |
| H | 6.526952996  | 1.486549140  | -1.414462581 |
| H | 7.621960502  | 1.025284976  | 0.752749944  |
| H | 6.475548619  | -0.388150522 | 2.477755582  |
| C | 0.564634265  | -1.135808225 | -0.188772955 |
| C | 2.723040784  | -0.890572456 | -0.234202629 |
| N | 1.111432483  | -2.376102542 | -0.672467289 |
| N | 2.459333550  | -2.193055030 | -0.750711314 |
| N | 1.564033830  | -0.276382304 | 0.086915428  |
| O | 4.144923785  | -1.545042117 | 2.043755026  |
| O | -0.367181368 | 1.430820146  | 0.778743510  |
| H | 3.043206752  | -2.952544691 | -0.340416582 |
| H | 0.585577124  | 1.134982671  | 0.697265262  |
| C | 0.510075172  | -2.999316092 | -1.836266060 |
| C | 0.038578262  | -4.309577055 | -1.706256740 |
| C | 0.404549946  | -2.297282038 | -3.041516117 |
| C | -0.549405846 | -4.921610639 | -2.808822575 |
| H | 0.145220080  | -4.835135841 | -0.754719494 |
| C | -0.194162647 | -2.929627898 | -4.126618210 |
| H | 0.778965857  | -1.274422289 | -3.116740000 |
| C | -0.665964004 | -4.234771061 | -4.015446338 |
| H | -0.918027201 | -5.949802577 | -2.732514972 |
| H | -0.294795978 | -2.397061006 | -5.078629644 |
| H | -1.127372101 | -4.726751943 | -4.877632875 |

S1S0-D

|   |               |               |               |
|---|---------------|---------------|---------------|
| C | -0.7326453626 | 1.5526675790  | 3.0903977241  |
| C | -0.3530197663 | 0.8226536417  | 1.9674797111  |
| C | -1.0904649450 | 1.0028481571  | 0.7896621125  |
| C | -2.1682426248 | 1.8898590818  | 0.7073002578  |
| C | -2.5230981749 | 2.6052081690  | 1.8474005327  |
| C | -1.8106798762 | 2.4329956376  | 3.0316013935  |
| H | -0.1787786822 | 1.4284567317  | 4.0261037425  |
| H | 0.4921825296  | 0.1350216089  | 1.9974514217  |
| H | -2.7055844613 | 2.0101300116  | -0.2351469460 |
| H | -3.3650678805 | 3.3036371497  | 1.8110457677  |
| H | -2.1010698184 | 2.9961497760  | 3.9261280204  |
| C | -3.8301099170 | -3.7572456925 | 0.9070894448  |
| C | -2.6980881076 | -4.2829545818 | 0.3577797222  |
| C | -1.6313127387 | -3.4168276405 | -0.0975376978 |
| C | -1.8387755375 | -1.9848082325 | 0.0736117650  |
| C | -3.0272827452 | -1.4809017893 | 0.6642648730  |

|   |               |               |               |
|---|---------------|---------------|---------------|
| C | -4.0015870589 | -2.3523216652 | 1.0765806678  |
| H | -4.6506670416 | -4.4180919216 | 1.2252575824  |
| H | -2.5522576445 | -5.3549209558 | 0.2282059929  |
| H | -3.1544468927 | -0.3999825281 | 0.7951456821  |
| H | -4.9178325039 | -1.9836485348 | 1.5441058152  |
| C | 3.5742924047  | -0.7713867388 | -2.0931473795 |
| C | 4.9328230586  | -0.9164341048 | -1.7823318084 |
| C | 5.3797325840  | -1.0138057227 | -0.4549043388 |
| C | 4.4887809739  | -0.9232816702 | 0.6002626327  |
| C | 3.0737338989  | -0.7479030194 | 0.3354452200  |
| C | 2.6456581175  | -0.7037913546 | -1.0662764611 |
| H | 3.2486681708  | -0.7170303288 | -3.1338761788 |
| H | 5.6651314325  | -0.9703021773 | -2.5969404303 |
| H | 6.4456145470  | -1.1695661431 | -0.2615888095 |
| H | 4.8074175558  | -1.0465981084 | 1.6362284071  |
| C | -0.7824975020 | -1.1551030092 | -0.3595462025 |
| C | 1.1908532249  | -0.5710150420 | -1.3219935103 |
| N | -0.7118735627 | 0.2708270717  | -0.3975058028 |
| N | 0.5051917292  | 0.6143345691  | -0.9456902429 |
| N | 0.3488221575  | -1.6302637772 | -0.9603181979 |
| O | 2.2440804305  | -0.5290972473 | 1.2410963749  |
| O | -0.5732223005 | -3.8608424698 | -0.6145409221 |
| H | 1.0529281393  | 1.3326168363  | -0.4345806003 |
| H | 0.4849423999  | -2.6596868888 | -1.0496411880 |
